# Supplementary material for: pH- and photothermal-driven multistage delivery nanoplatform for overcoming cancer drug resistance
Source: PubMed Central journal article supplement — Theranostics. 2019 May 31;9(13):3825–39. doi: 10.7150/thno.33958 (PMC6587350; doi:10.7150/thno.33958), 2019-05-31
Supplement: thnov09p3825s1.pdf [file thnov09p3825s1.pdf]

## **pH- and photothermal-driven multistage delivery nanoplatfrom for overcoming cancer drug resistance**

Wenjing Huang<sup>1, ‡</sup>, Hao Zhao<sup>1, ‡</sup>, Jiangshan Wan<sup>1</sup>, Yang Zhou<sup>1</sup>, Qingbo Xu<sup>1</sup>, Yanbing Zhao<sup>1,2,\*</sup>, Xiangliang Yang<sup>1,2,\*</sup>, Lu Gan<sup>1,2,\*</sup>

1. National Engineering Research Center for Nanomedicine, College of Life Science and Technology, Huazhong University of Science and Technology, Wuhan 430074, China.
2. Hubei Key Laboratory of Bioinorganic Chemistry and Materia Medica, Huazhong University of Science and Technology, Wuhan 430074, China

<sup>#</sup>These authors contributed equally to this work.

\*Corresponding author: E-mail: lugan@mail.hust.edu.cn (L. Gan), zhaoyb@mail.hust.edu.cn (Y. Zhao), yangxl@mail.hust.edu.cn (X. Yang)

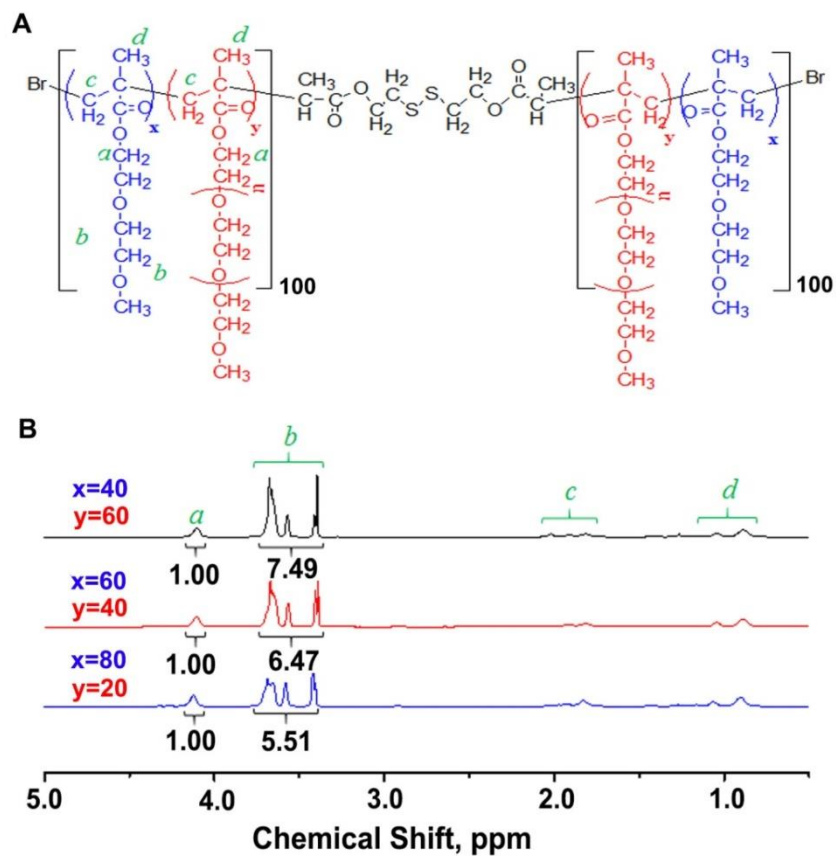

**Figure S1.** Identification of  $\text{PMEO}_2\text{MA}_{80}\text{-OEGMA}_{120}$ ,  $\text{PMEO}_2\text{MA}_{120}\text{-OEGMA}_{80}$  and  $\text{PMEO}_2\text{MA}_{160}\text{-OEGMA}_{40}$ . (A) Chemical structure of  $\text{PMEO}_2\text{MA}_{80}\text{-OEGMA}_{120}$ ,  $\text{PMEO}_2\text{MA}_{120}\text{-OEGMA}_{80}$  and  $\text{PMEO}_2\text{MA}_{160}\text{-OEGMA}_{40}$ . (B)  $^1\text{H-NMR}$  spectra of  $\text{PMEO}_2\text{MA}_{80}\text{-OEGMA}_{120}$ ,  $\text{PMEO}_2\text{MA}_{120}\text{-OEGMA}_{80}$  and  $\text{PMEO}_2\text{MA}_{160}\text{-OEGMA}_{40}$ .

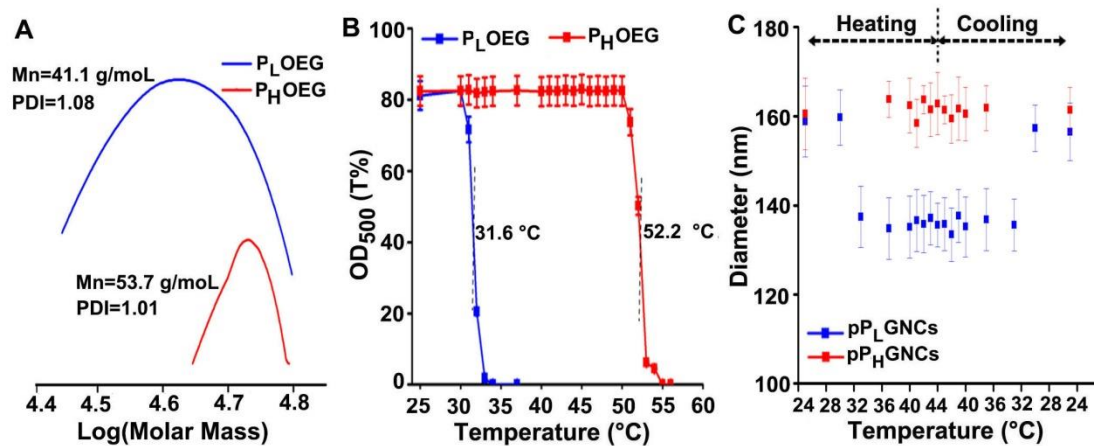

**Figure S2.** Characterization of P<sub>L</sub>OEG and P<sub>H</sub>OEG. (A) GPC spectra of P<sub>L</sub>OEG and P<sub>H</sub>OEG. (B) Transmittance of P<sub>L</sub>OEG and P<sub>H</sub>OEG at 500 nm after incubation in PBS at the indicated temperatures for 5 min. (C) Diameter change of P<sub>L</sub>OEG and P<sub>H</sub>OEG incubating in PBS at the different temperatures. The data are presented as the mean ± SD (n = 3).

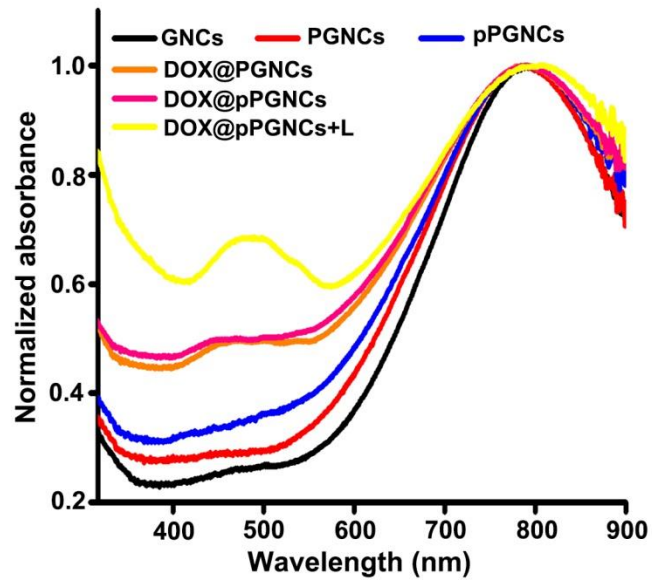

**Figure S3.** UV-Vis-NIR spectra of GNCs, pGNCs, pPGNCs, DOX@PGNCs, DOX@pPGNCs and DOX@pPGNCs undergoing five cycles of 808 nm laser irradiation ( $0.7 \text{ W/cm}^2$ , 10 min) and then cooling to room temperature (10 min).

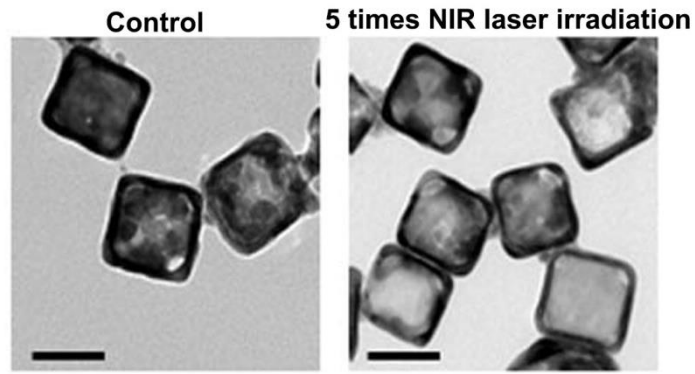

**Figure S4.** TEM images of DOX@pPGNCs after undergoing five cycles of 808 nm laser irradiation ( $0.7 \text{ W/cm}^2$ , 10 min) and then cooling to room temperature (10 min).

Scale bar: 50 nm.

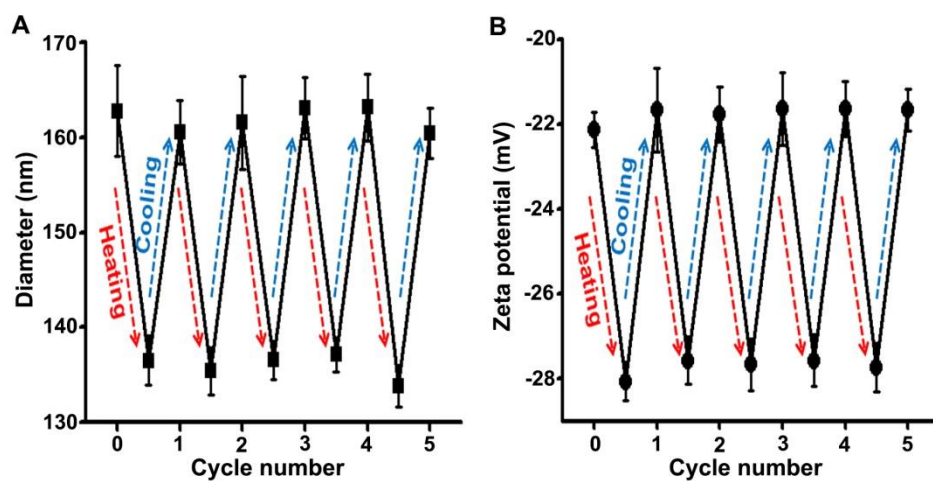

**Figure S5.** Change in size (A) and zeta potential (B) of DOX@pPGNCs undergoing five cycles of 808 nm laser irradiation ( $0.7 \text{ W/cm}^2$ , 10 min) and then cooling to room temperature (10 min).

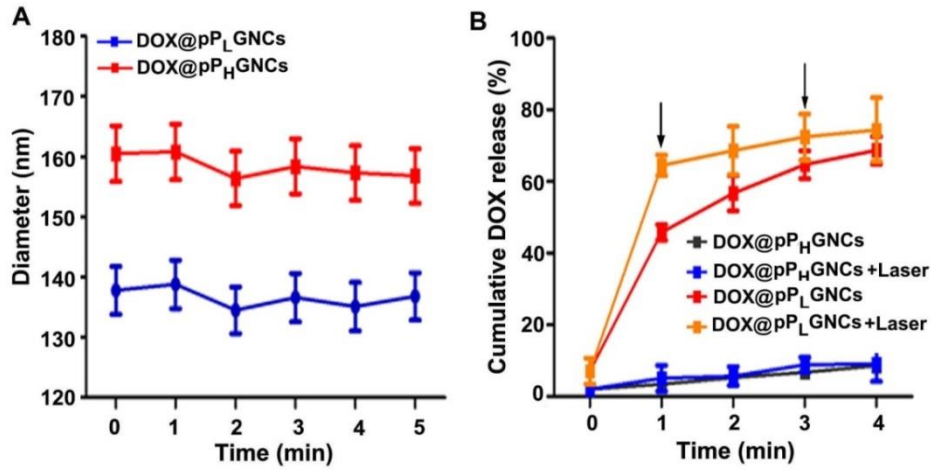

**Figure S6.** Characterization of DOX@pP<sub>L</sub>OEG and DOX@pP<sub>H</sub>OEG upon NIR laser irradiation. (A) Diameter of DOX@pP<sub>L</sub>OEG and DOX@pP<sub>H</sub>OEG upon 808 nm laser irradiation ( $0.7 \text{ W/cm}^2$ ) for different time intervals. (B) *In vitro* DOX release profiles from DOX@pP<sub>L</sub>OEG and DOX@pP<sub>H</sub>OEG in PBS with or without 808 nm laser irradiation ( $0.7 \text{ W/cm}^2$ ) for 5 min. Black arrows indicate the irradiation points. The data are presented as the mean  $\pm$ SD ( $n = 3$ ).

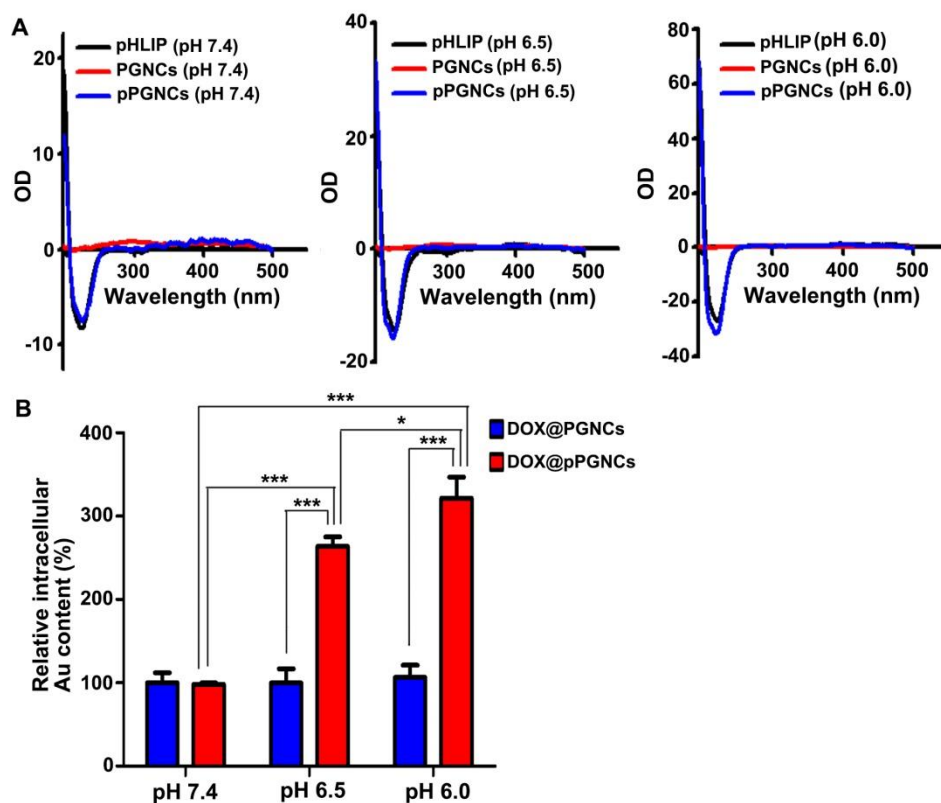

**Figure S7.** Conformation and cellular internalization of pPGNCs at different pH values. (A) CD spectra of pHLIP, PGNCs and pPGNCs at different pH values. (B) Cellular uptake of DOX@PGNCs and DOX@pPGNCs by MCF-7/ADR cells at different pH values. The data are presented as the mean  $\pm$  SD (n = 3). \* $P$ <0.05, \*\*\* $P$ <0.001.



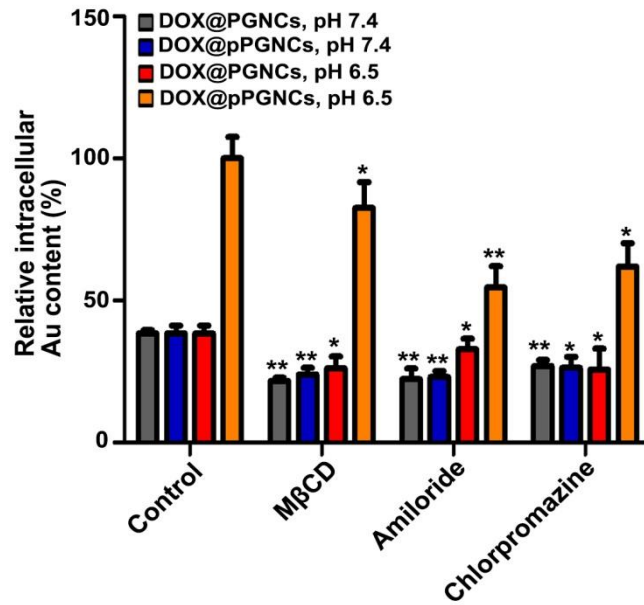

**Figure S8.** Cellular internalization of DOX@PGNCs and DOX@pPGNCs in MCF-7/ADR cells pretreated with 5 mM MβCD, 10 μg/mL chlorpromazine or 2 mM amiloride for 1 h, followed by treatment with DOX@PGNCs or DOX@pPGNCs at Au concentration of 10 μg/mL at pH 7.4 or 6.5 for 12 h. The data are presented as the mean ± SD (n = 3). \* $P < 0.05$ , \*\* $P < 0.001$  compared with the corresponding control group.

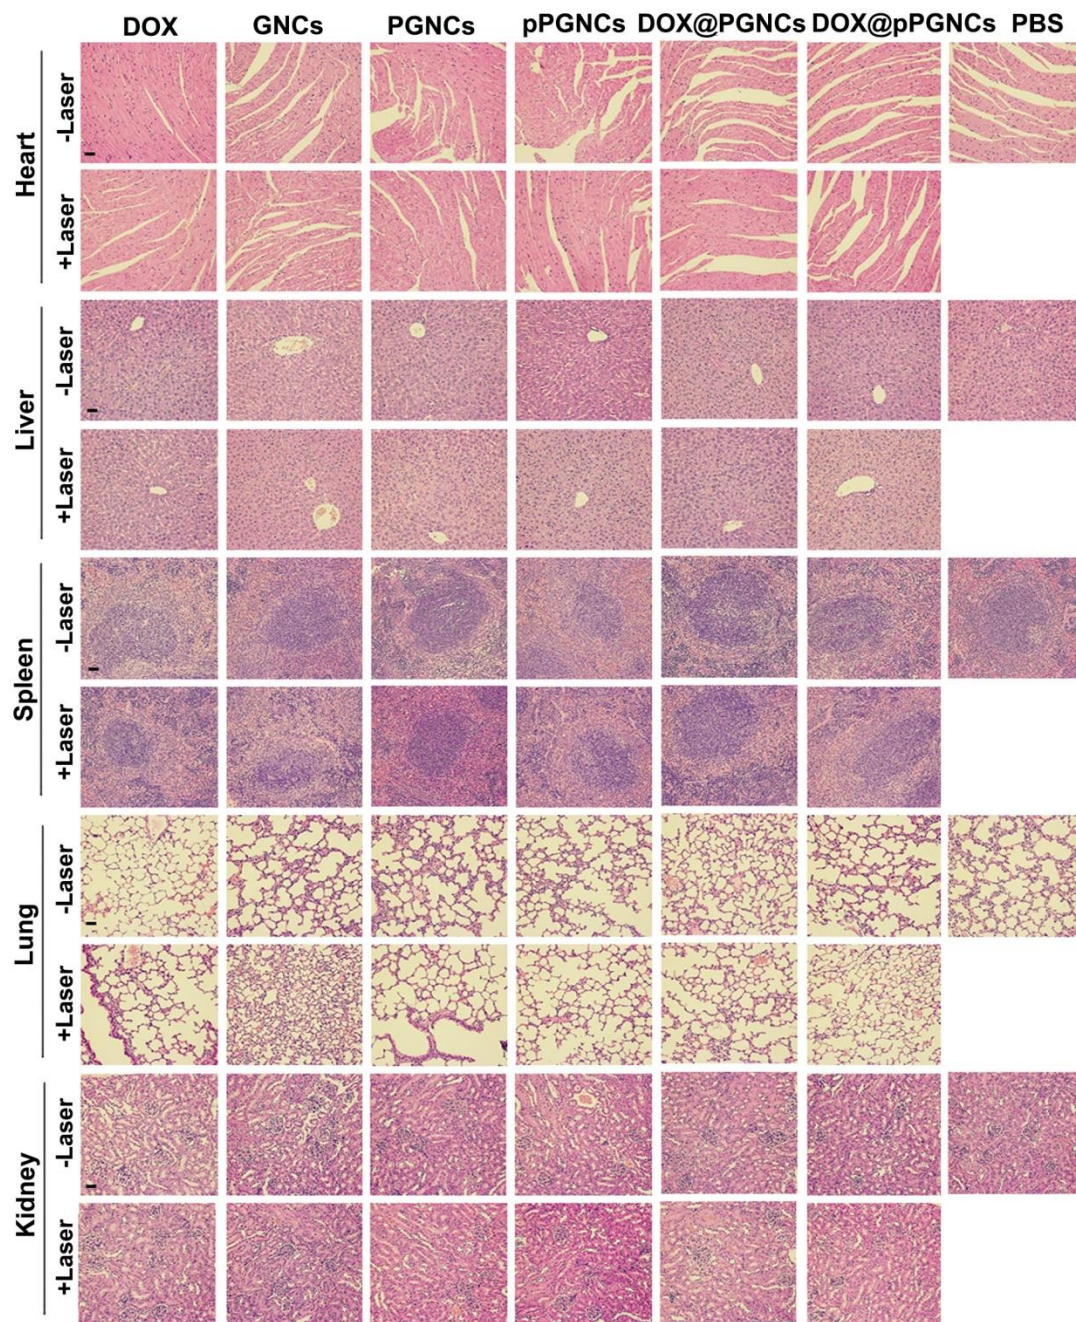

**Figure S9.** Histological observation of major organs, including heart, liver, spleen, lung and kidney after treatment by H&E staining. Scale bar is 200  $\mu\text{m}$ .

**Table S1.** Molecular weight and composition characterization of the PMEO<sub>2</sub>MA<sub>x</sub>-OEGMA<sub>200-x</sub> polymers

| PMEO <sub>2</sub> MA <sub>x</sub> -OEGMA <sub>200-x</sub> |       | $M_n^a$ , kDa      |                    |                  | MEO <sub>2</sub> MA/OEGMA <sup>b</sup> |                  |
|-----------------------------------------------------------|-------|--------------------|--------------------|------------------|----------------------------------------|------------------|
|                                                           |       | $M_n(\text{theo})$ | $M_n(\text{meas})$ | PDI <sup>a</sup> | $R(\text{theo})$                       | $R(\text{meas})$ |
| P <sub>L</sub> OEG                                        | x=160 | 42.6               | 41.1               | 1.08             | 0.67                                   | 0.67             |
| POEG                                                      | x=120 | 47.0               | 48.8               | 1.06             | 1.50                                   | 1.54             |
| P <sub>H</sub> OEG                                        | x=80  | 51.5               | 53.7               | 1.01             | 4.00                                   | 3.95             |

<sup>a</sup>  $M_n(\text{theo})$  represents the theoretic values of number-average molecular weight ( $M_n$ ), which was calculated according to the feeding ratio between monomer and initiator.  $M_n(\text{meas})$  represents the measured values of  $M_n$  with the polydispersitivity index (PDI) measured by GPC.

<sup>b</sup> The molar ratio of both monomers (MEO<sub>2</sub>MA and OEGMA).  $R(\text{theo})$  represents the feeding ratio of MEO<sub>2</sub>MA and OEGMA, and  $R(\text{meas})$  represents the measured value of MEO<sub>2</sub>MA and OEGMA amount in polymers by <sup>1</sup>H-NMR.

**Table S2.** Secondary conformation of pHLIP and pPGNCs at different pH values by CD analysis

| <b>Sample</b>   | <b><math>\alpha</math>-helix</b> | <b><math>\beta</math>-sheet</b> | <b><math>\beta</math>-turn</b> | <b>random coil</b> |
|-----------------|----------------------------------|---------------------------------|--------------------------------|--------------------|
| pHLIP (pH 7.4)  | 8.9%                             | 65.9%                           | 6.5%                           | 18.7%              |
| pHLIP (pH 6.5)  | 26.9%                            | 34.1%                           | 20.2%                          | 18.8%              |
| pHLIP (pH 6.0)  | 51.2%                            | 20.6%                           | 22.9%                          | 5.3%               |
| pPGNCs (pH 7.4) | 13.0%                            | 56.9%                           | 10.8%                          | 19.3%              |
| pPGNCs (pH 6.5) | 27.0%                            | 42.7%                           | 16.0%                          | 14.4%              |
| pPGNCs (pH 6.0) | 52.8%                            | 10.8%                           | 22.7%                          | 13.7%              |
